# Supplementary material for: Hierarchical porous zeolitic imidazolate frameworks (ZIF-8) and ZnO@N-doped carbon for selective adsorption and photocatalytic degradation of organic pollutants
Source: Royal Society of Chemistry journal article supplement (doi:10.1039/d2ra00503d), 2022-01-01
Supplement: d2ra00503d1.pdf [file d2ra00503d1.pdf]

## Supporting Information

### Hierarchical Porous Zeolitic Imidazolate Frameworks (ZIF-8) and ZIF8-derived ZnO@N-doped Carbon for Selective Adsorption and Photocatalytic Degradation of Organic Pollutants

Ahmed I. A. Soliman,<sup>†,‡</sup> Aboel-Magd A. Abdel-Wahab,<sup>†</sup> and Hani Nasser Abdelhamid<sup>‡,¶,\*</sup>

<sup>†</sup>Chemistry Department, Faculty of Science, Assiut University, Assiut 71516, Egypt

<sup>‡</sup>Department of Chemical Engineering, Lakehead University, 955 Oliver Road, Thunder Bay, ON, P7B 5E1, Canada

<sup>‡</sup>Advanced Multifunctional Materials Laboratory, Chemistry Department, Assiut University, Assiut 71516, Egypt

<sup>¶</sup>Proteomics Laboratory for Clinical Research and Materials Science, Department of Chemistry, Assiut University, Assiut, 71516, Egypt

\* Corresponding author: [hany.abdelhamid@aun.edu.eg](mailto:hany.abdelhamid@aun.edu.eg) (Abdelhamid); [Tel:+201029952642](tel:+201029952642); Fax: 0020-88.234222

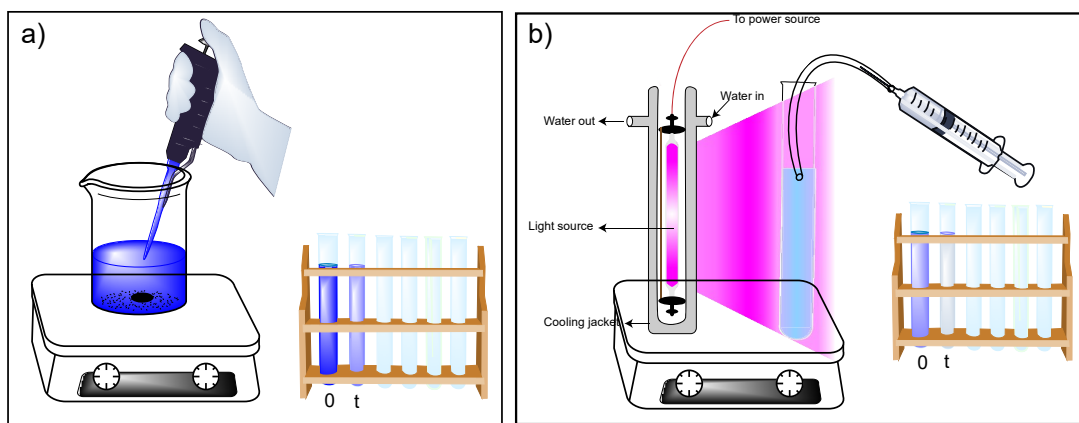

**Figure S1** Schematic illustration of a) adsorption and b) UV photodegradation on ZnO@C.

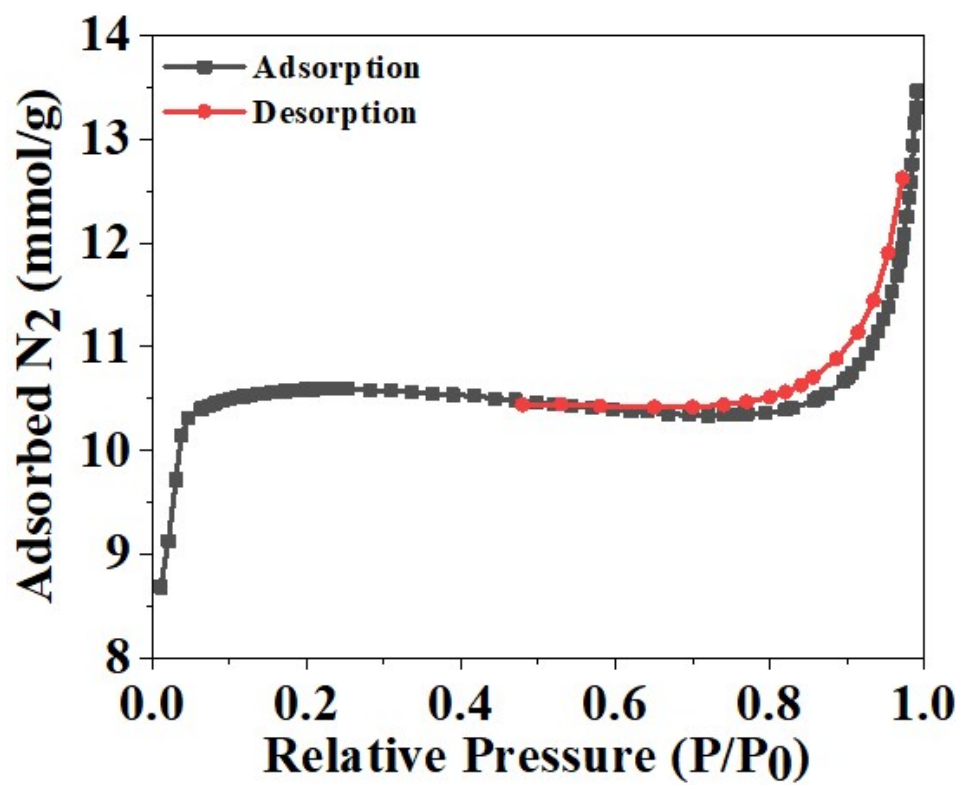

**Figure S2** N<sub>2</sub> adsorption-desorption isotherm for ZIF-8.

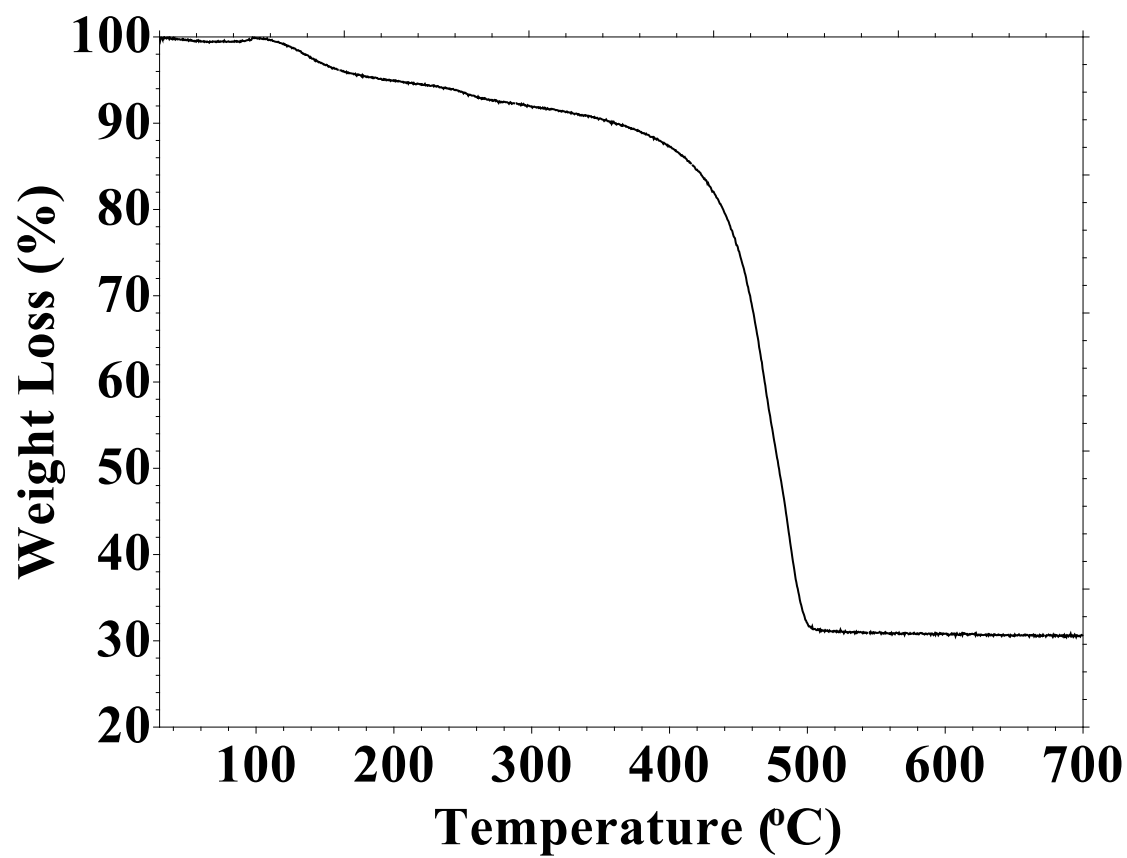

Figure S3 TGA for ZIF-8.

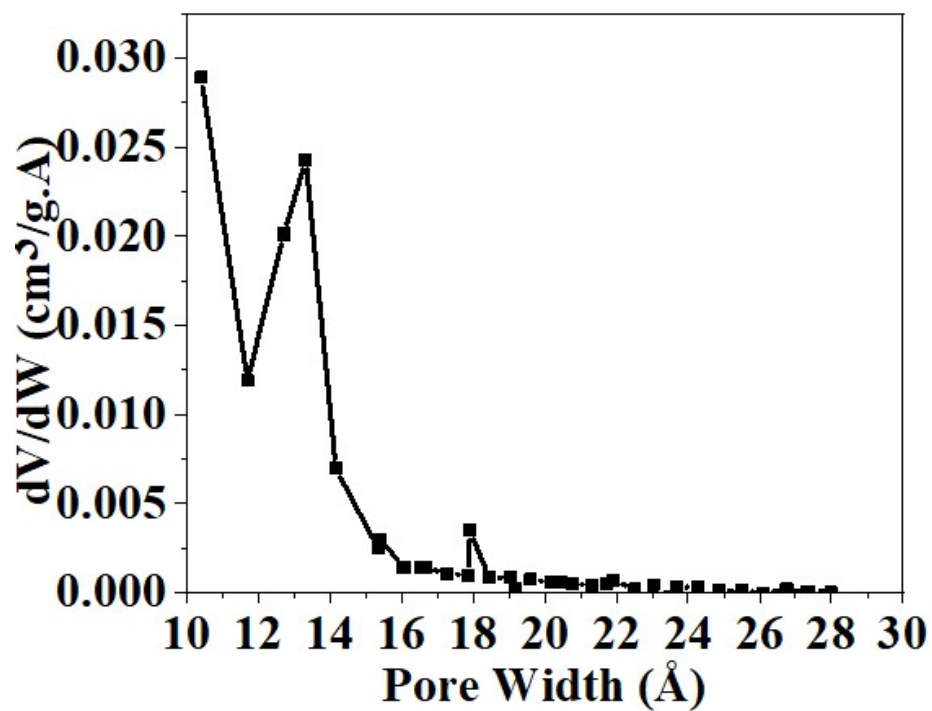

Figure S4 Pore size distribution using HK method.

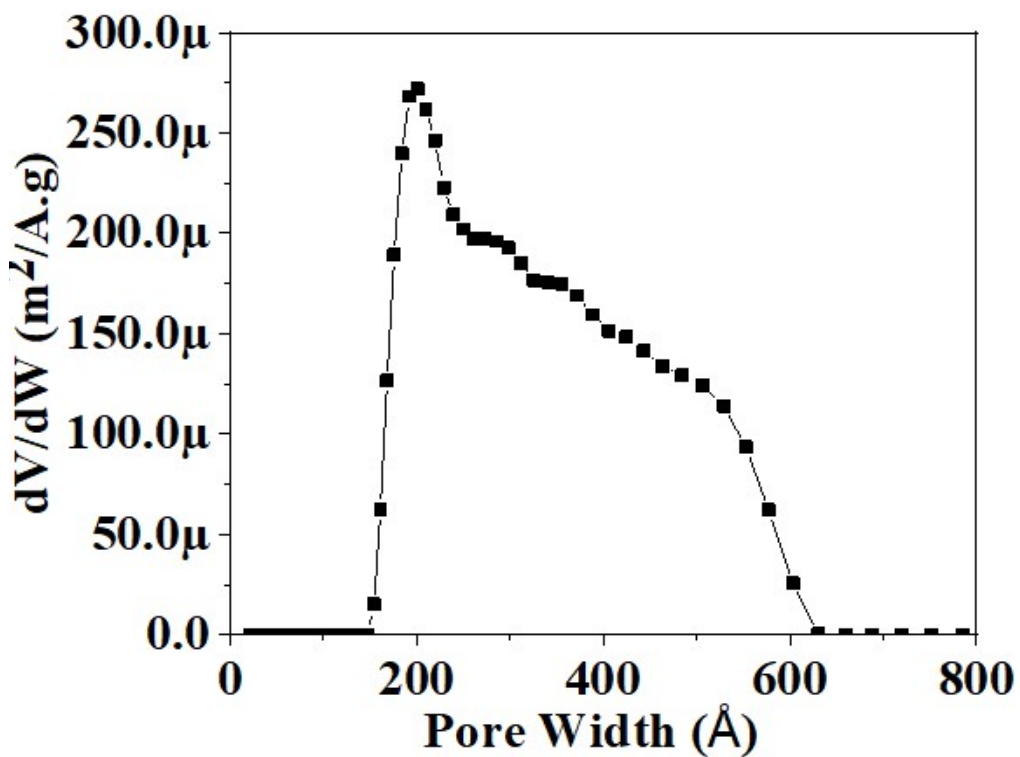

Figure S5 Pore size distribution using DFT method.

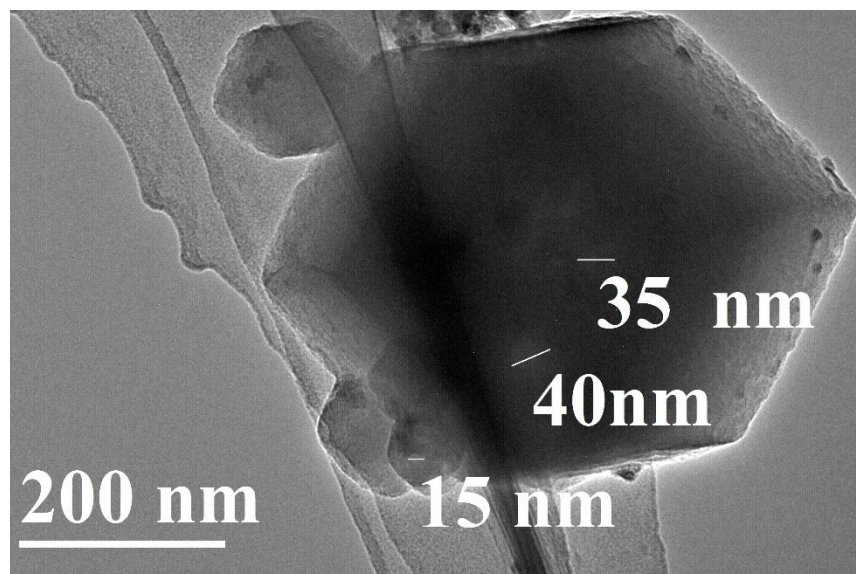

Figure S6 TEM image of ZIF-8 showing the pore size.

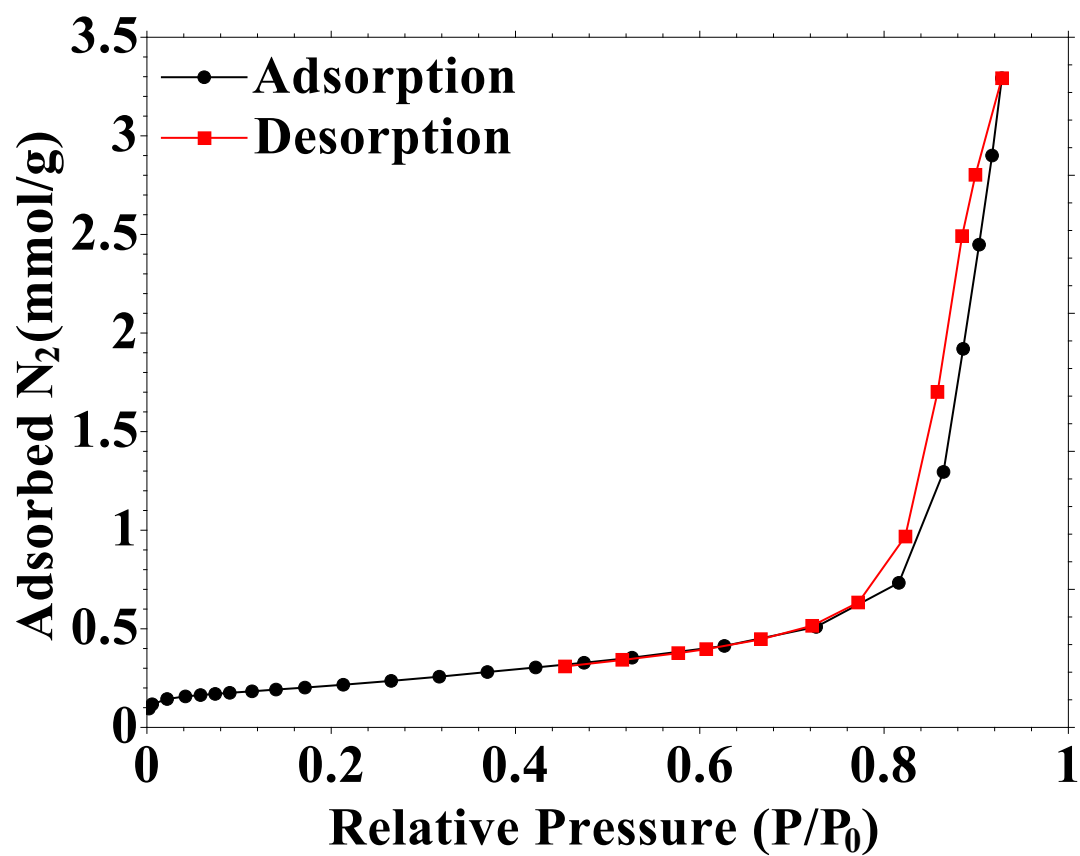

Figure S7 N<sub>2</sub> adsorption-desorption isotherm for ZnO@N-doped C.

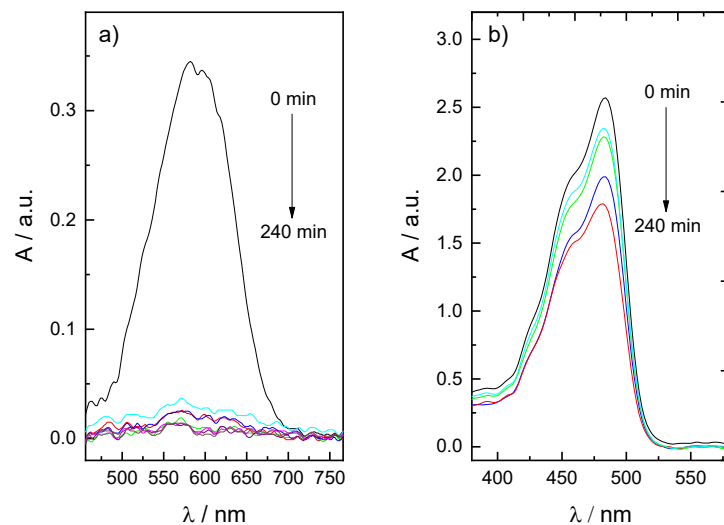

**Figure S8** UV-Vis absorbance spectra of a) MeB and b) FLU during the adsorption on ZIF-8 at different time.

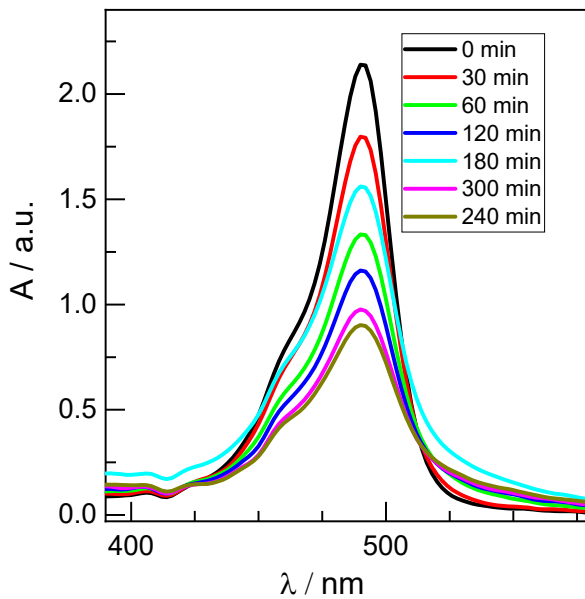

**Figure S9** UV-Vis absorbance spectra of FLU under light irradiation on ZIF-8 at different time.

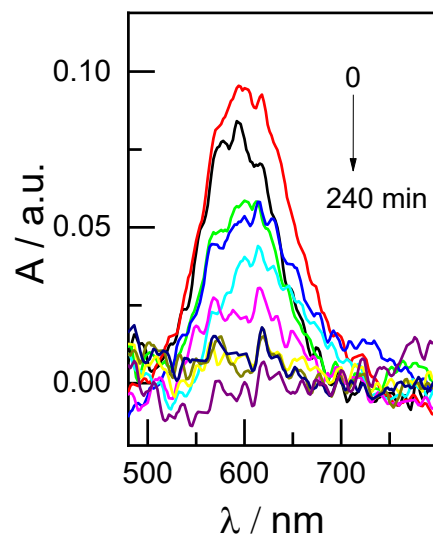

**Figure S10** UV-Vis absorbance spectra of MeB under light irradiation using ZnO@C.

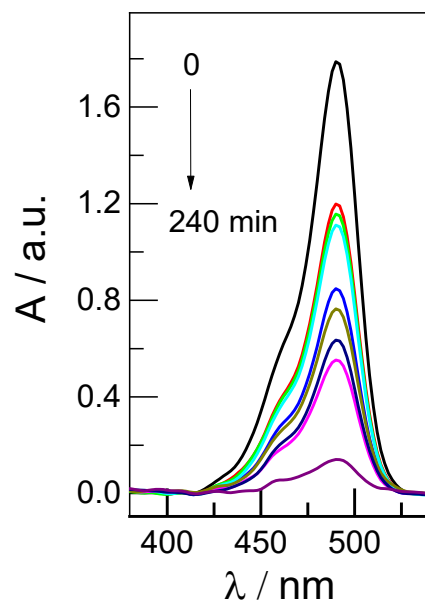

**Figure S11** UV-Vis absorbance spectra of FLU under light irradiation using ZnO@C.

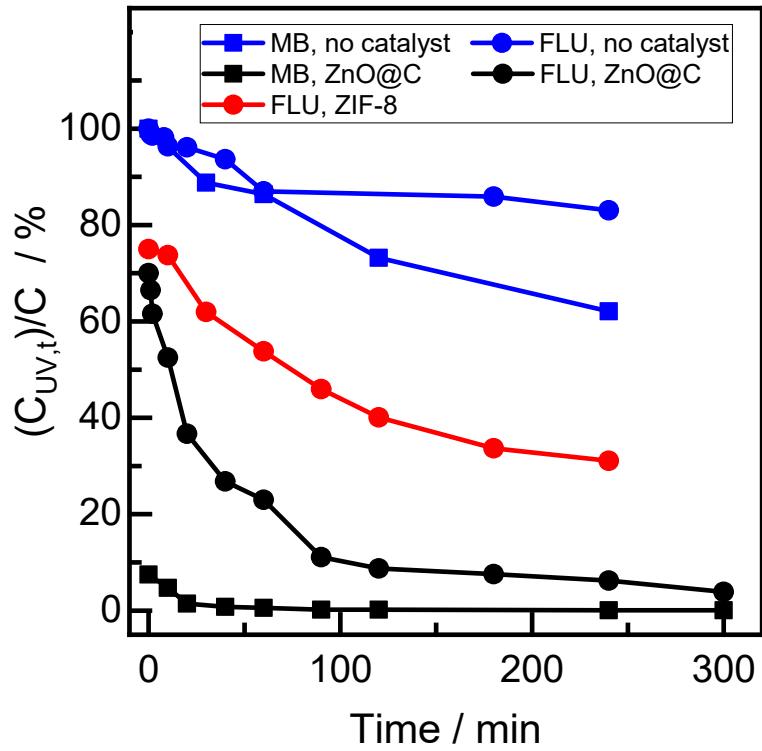

**Figure S12** Photocatalysis efficiency for MeB and FLU without and with catalysts ZIF-8 and ZnO@C.

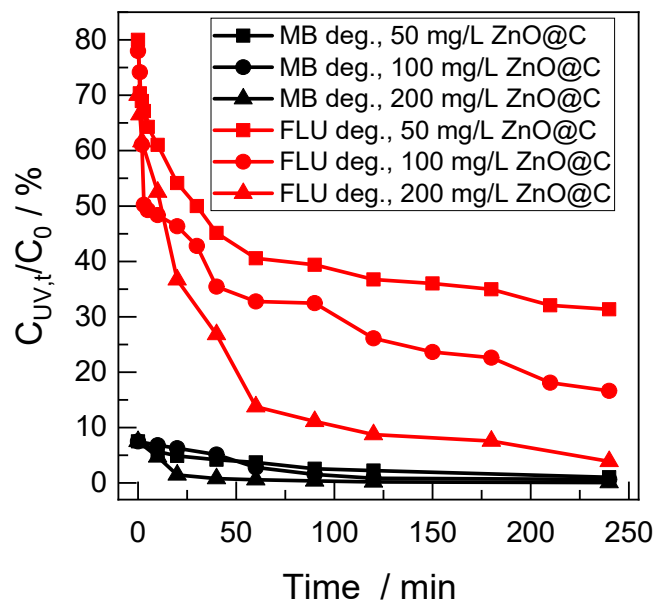



**Figure S13** Photocatalysis efficiency for MeB and FLU on ZnO@C.
